# Supplementary material for: CK2 Is the Regulator of SIRT1 Substrate-Binding Affinity, Deacetylase Activity and Cellular Response to DNA-Damage
Source: PubMed Central journal article supplement (PMC2721681; doi:10.1371/journal.pone.0006611), 2009-08-14
Supplement: pone.0006611.s001.pdf [file pone.0006611.s001.pdf]

| No | compound name                 | Target                                                          | No | compound name                          | Target                                                 |
|----|-------------------------------|-----------------------------------------------------------------|----|----------------------------------------|--------------------------------------------------------|
| 1  | PD-98059                      | MEK                                                             | 42 | ML-7                                   | MLCK                                                   |
| 2  | U-0126                        | MEK                                                             | 43 | ML-9                                   | MLCK                                                   |
| 3  | SB-203580                     | p38 MAPK<br>PKA, PKG, MLCK, and<br>PKC.                         | 44 | 2-Aminopurine<br>N9-Isopropyl-         | p58 PITSLRE beta1                                      |
| 4  | H-7                           | PKA, PKG, MLCK, and<br>PKC.                                     | 45 | olomoucine                             | CDK                                                    |
| 5  | H-9                           | PKC.                                                            | 46 | Olomoucine                             | CDK                                                    |
| 6  | Staurosporine                 | Pan-specific                                                    | 47 | iso-Olomoucine                         | Negative control for olomoucine.                       |
| 7  | AG-494                        | EGFRK, PDGFRK                                                   | 48 | Roscovitine                            | CDK<br>ERK2, adenosine kinase,                         |
| 8  | AG-825                        | HER1-2                                                          | 49 | 5-Iodotubercidin                       | CK1, CK2,                                              |
| 9  | Lavendustin A                 | EGFRK                                                           | 50 | LFM-A13                                | BTK                                                    |
| 10 | RG-14620                      | EGFRK                                                           | 51 | SB-202190                              | p38 MAPK                                               |
| 11 | Tyrphostin 23                 | EGFRK                                                           | 52 | PP2                                    | Src family                                             |
| 12 | Tyrphostin 25                 | EGFRK                                                           | 53 | ZM 336372                              | cRAF                                                   |
| 13 | Tyrphostin 46                 | EGFRK, PDGFRK                                                   | 54 | SU 4312                                | Flk1                                                   |
| 14 | Tyrphostin 47                 | EGFRK                                                           | 55 | AG-1296                                | PDGFRK                                                 |
| 15 | Tyrphostin 51                 | EGFRK<br>Negative control for<br>tyrosine kinase<br>inhibitors. | 56 | GW 5074                                | cRAF                                                   |
| 16 | Tyrphostin 1<br>Tyrphostin AG |                                                                 | 57 | Palmitoyl-DL-<br>carnitine Cl          | PKC                                                    |
| 17 | 1288<br>Tyrphostin AG         | Tyrosine kinases                                                | 58 | Rottlerin                              | PKC delta                                              |
| 18 | 1478<br>Tyrphostin AG         | EGFRK                                                           | 59 | Genistein                              | Tyrosine Kinases<br>Negative control for<br>Genistein. |
| 19 | 1295                          | Tyrosine kinases                                                | 60 | Daidzein                               | EGFRK                                                  |
| 20 | Tyrphostin 9                  | PDGFRK                                                          | 61 | Erbstatin analog                       | PI 3-K                                                 |
| 21 | HNMPA                         | IRK                                                             | 62 | Quercetin dihydrate                    | Flk1                                                   |
| 22 | PKC-412                       | PKC inhibitor                                                   | 63 | SU1498                                 | JAK-3                                                  |
| 23 | Piceatannol                   | Syk                                                             | 64 | ZM 449829                              | IKK pathway                                            |
| 24 | PP1                           | Src family                                                      | 65 | BAY 11-7082                            | CK2                                                    |
| 25 | AG-490                        | JAK-2                                                           | 66 | DRB                                    | PKC alpha, PKC gamma                                   |
| 26 | AG-126                        | IRAK                                                            | 67 | HBDDE                                  | JNK                                                    |
| 27 | AG-370                        | PDGFRK                                                          | 68 | SP 600125                              | GSK-3beta, CDK5                                        |
| 28 | AG-879                        | NGFRK                                                           | 69 | Indirubin<br>Indirubin-3'-<br>monoxime | GSK-3beta                                              |
| 29 | LY 294002                     | PI 3-K                                                          | 70 | Y-27632                                | ROCK                                                   |
| 30 | Wortmannin                    | PI 3-K                                                          | 71 | Kenpaullone                            | GSK-3beta                                              |
| 31 | GF 109203X                    | PKC                                                             | 72 | Terreic acid                           | BTK                                                    |
| 32 | Hypericin                     | PKC                                                             | 73 | Triciribine                            | Akt signaling pathway                                  |
| 33 | Ro 31-8220                    | PKC                                                             | 74 | BML-257                                | Akt                                                    |
| 34 | Sphingosine                   | PKA                                                             | 75 | SC-514                                 | IKK2                                                   |
| 35 | H-89                          | PKA, PKG                                                        | 76 | BML-259                                | Cdk5/p25                                               |
| 36 | H-8                           | PKA, PKG                                                        | 77 | Apigenin                               | CK2                                                    |
| 37 | HA-1004                       | EGFRK, CaMK II                                                  | 78 | BML-265                                | EGFRK                                                  |
| 38 | HA-1077                       | CaMK II                                                         | 79 | Rapamycin                              | mTOR                                                   |
| 39 | HDBA                          | CaMK II                                                         | 80 | TBCA                                   | CK2                                                    |
| 40 | KN-62                         | CaMK II                                                         |    |                                        |                                                        |
| 41 | KN-93                         | CaMK II                                                         |    |                                        |                                                        |

**Table S1 List of kinase inhibitors used for SIRT1-kinase screen.** The names of the inhibitors and the kinases targeted by the inhibitors are shown.
