# Supplementary material for: CK2 Is the Regulator of SIRT1 Substrate-Binding Affinity, Deacetylase Activity and Cellular Response to DNA-Damage
Source: PubMed Central journal article supplement (PMC2721681; doi:10.1371/journal.pone.0006611), 2009-08-14
Supplement: pone.0006611.s002.pdf [file pone.0006611.s002.pdf]

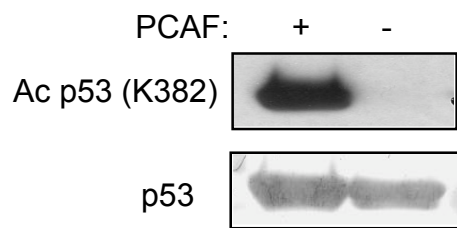

**Figure. S1. Acetylation of p53 K382.** GST-p53 acetylated by PCAF was immunoblotted with acetyl-K382 antibody.
